# Supplementary material
Source: PubMed Central journal article supplement (PMC2639753)

# SUPPLEMENTARY DATA BMC 2008

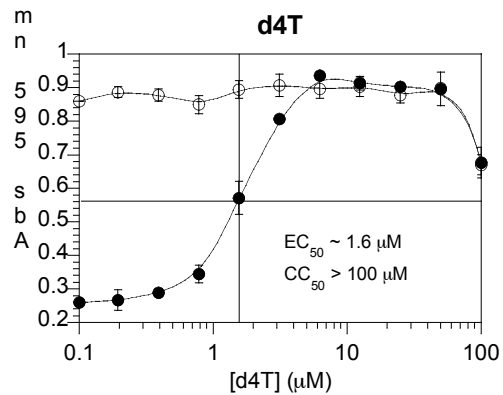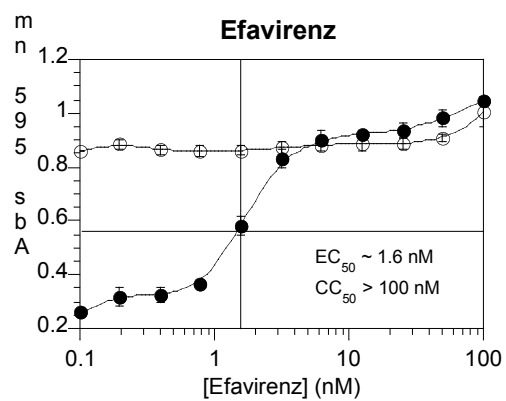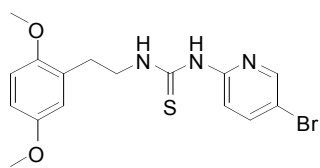

**HI-236**

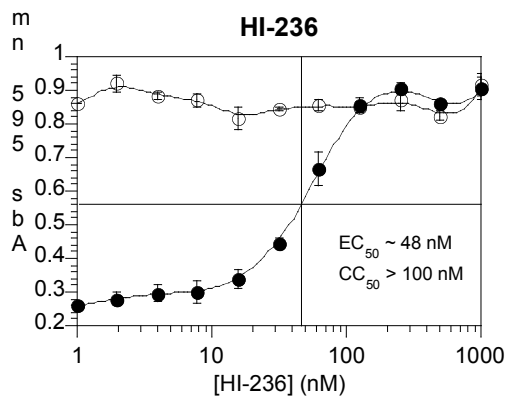

**6a**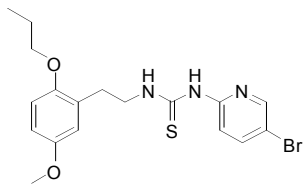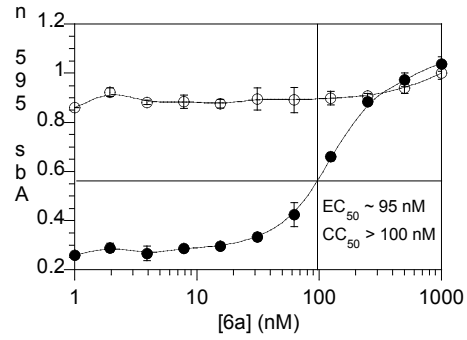**6b**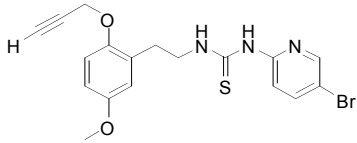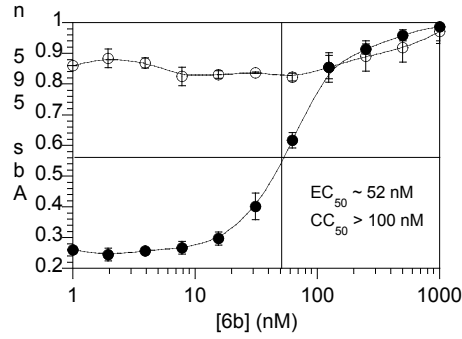**6c**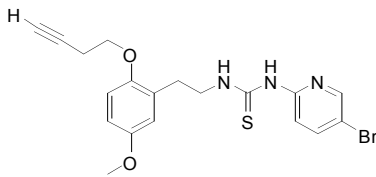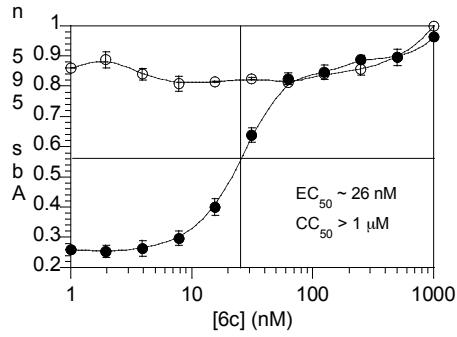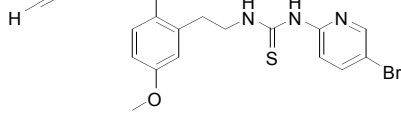**6d**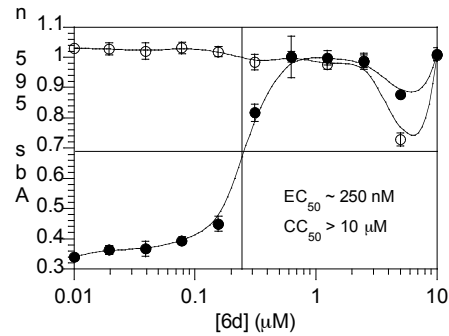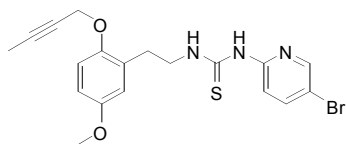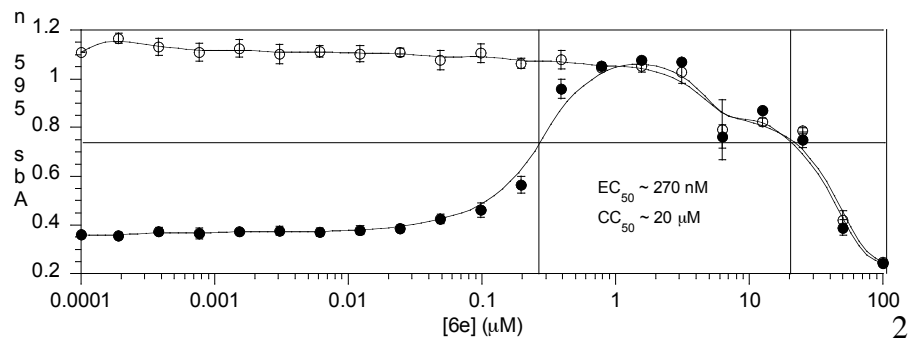

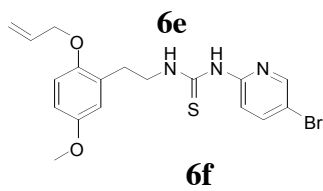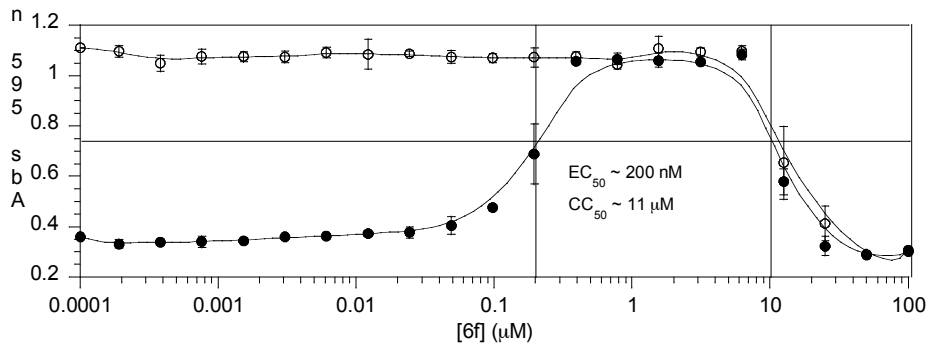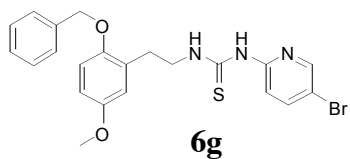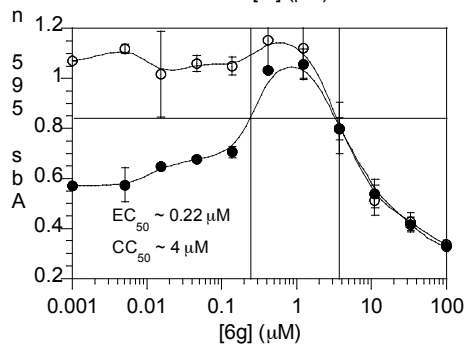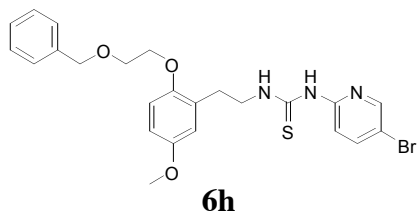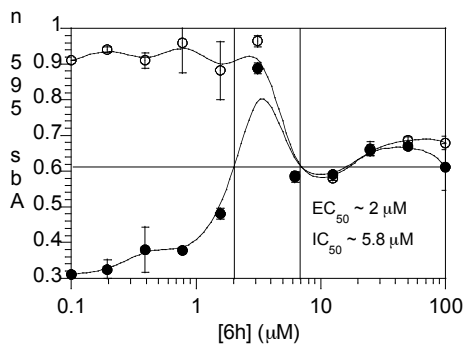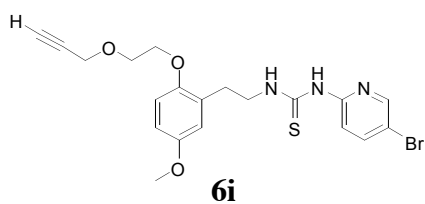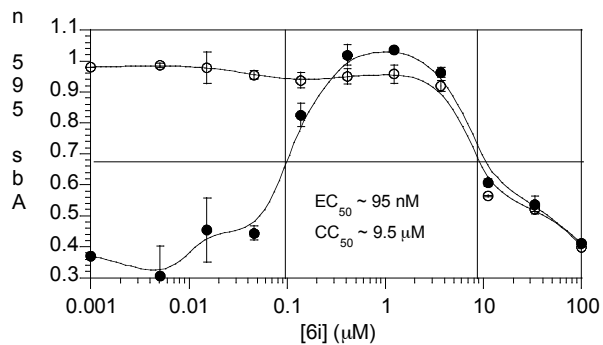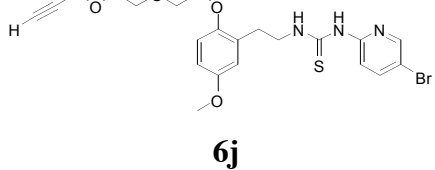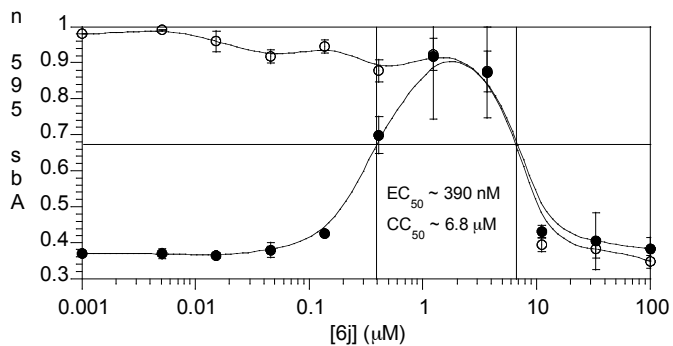

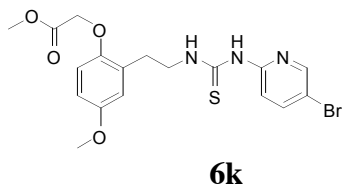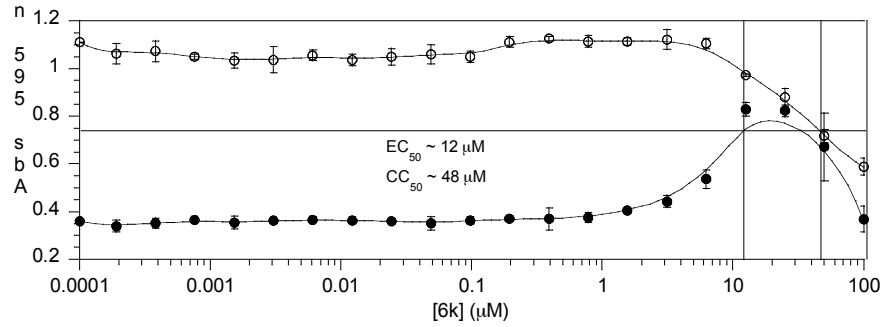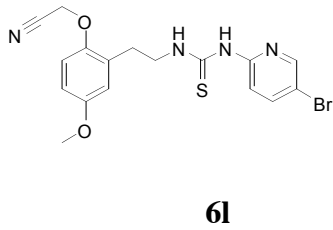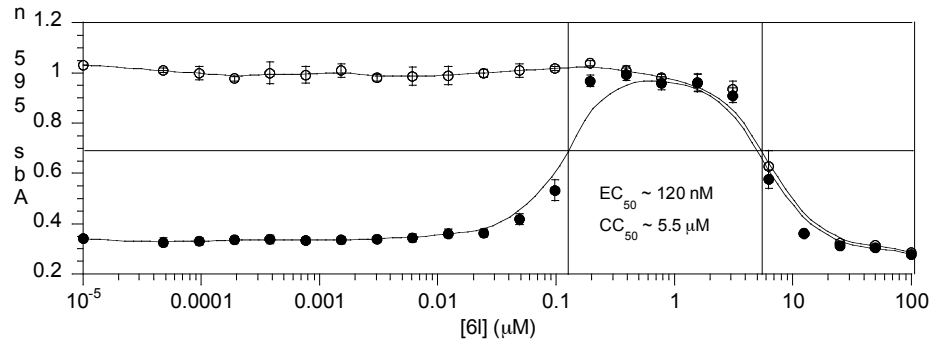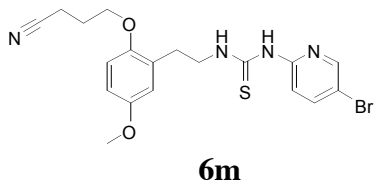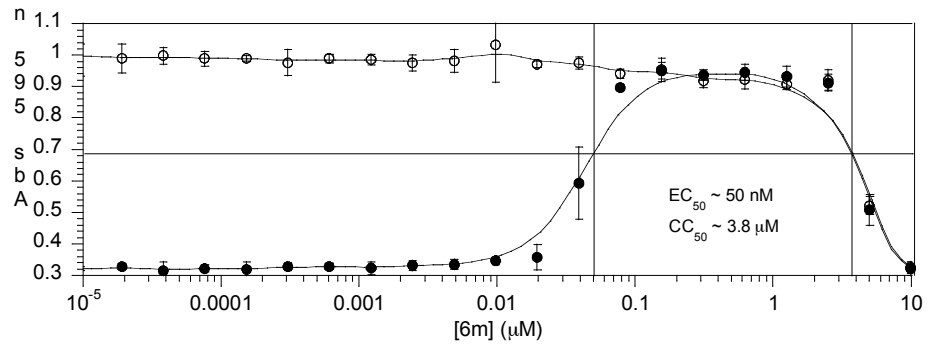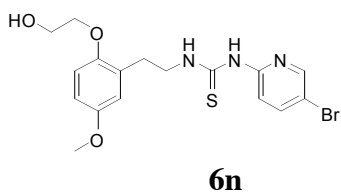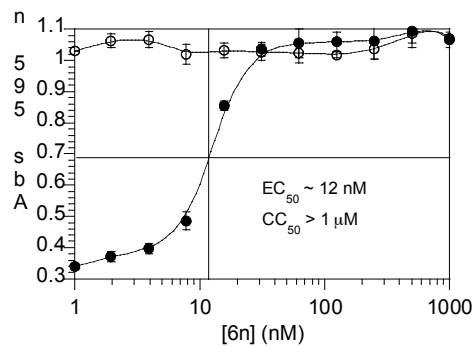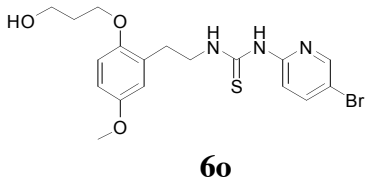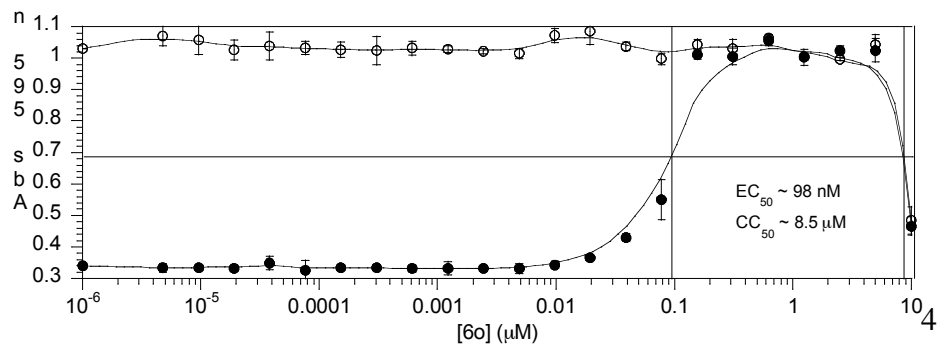

## Resistant strain Y181C cell-culture results

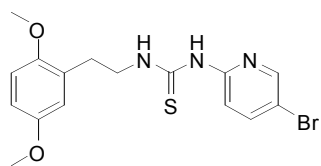

**HI-236**

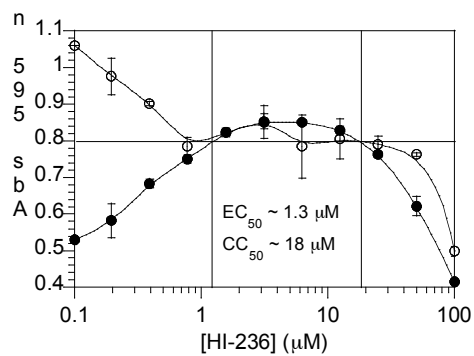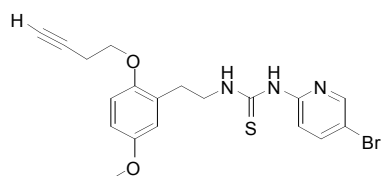

**6c**

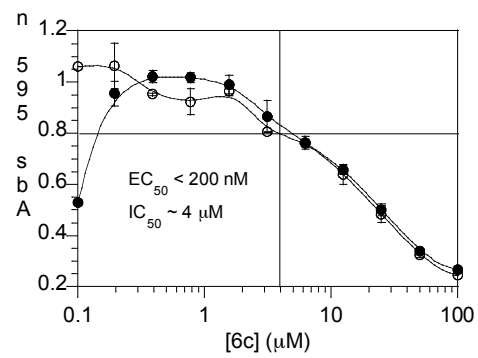

Supplement: NIHMS88222-supplement.pdf [file NIHMS88222-supplement.pdf]
